# Supplementary material for: Aberrant salience network and its functional coupling with default and executive networks in minimal hepatic encephalopathy: a resting-state fMRI study
Source: PubMed Central journal article supplement (PMC4890427; doi:10.1038/srep27092), 2016-06-01

**Aberrant salience network and its functional coupling with default and executive networks in minimal hepatic encephalopathy: a resting-state fMRI study**

Hua-Jun Chen<sup>1, \*</sup>, Qiu-Feng Chen<sup>2</sup>, Jun Liu<sup>1</sup>, Hai-Bin Shi<sup>1, \*</sup>

<sup>1</sup> Department of Radiology, The First Affiliated Hospital of Nanjing Medical University, Nanjing 210029, China

<sup>2</sup> School of Information Science and Engineering, Central South University, Changsha 410083, China

**\*Corresponding author:**

Hua-Jun Chen, MD; Hai-Bin Shi, MD

Department of Radiology, The First Affiliated Hospital of Nanjing Medical University, Nanjing 210029, China

Tel.: +86 25 68137519; fax: +86 25 68137518

E-mail addresses: [chj0075@126.com](mailto:chj0075@126.com); [shihb@vip.sina.com](mailto:shihb@vip.sina.com)

### **Time-lagged inter-iFC**

SN is an integral hub in mediating dynamic activities between the CEN and DMN. We hypothesized an altered temporal interaction between SN's preceding TC and DMN/CEN TCs in MHE. A time-lagged correlation analysis was performed to investigate temporal dependencies between the SN and CEN/DMN subsystems. A pairwise correlation analysis was applied on SN's centered TC and TCs of DMN/CEN, with a time shift of 1 to 3 time points (i.e.,  $SN_{t(i_0)} \rightarrow DMN/CEN_{t(i_0 + \Delta i)}$  for  $i_0 = 1$  to  $n$  time points and  $\Delta i = 1-3$  time points). The Pearson's correlation coefficients obtained were then transformed to Z-scores using Fisher's Z-transformation and compared across the three groups, with age, gender, education level, and GM volumes as covariates of no interest ( $P < 0.05$ , FDR correction).

### **Supplementary Figure legend**

**Supplementary Figure 1.** Differences in the mean intra-iFC of the entire intrinsic network. The intra-iFC was measured using the Z value retrieved by independent component analysis. The marker ‡ indicates the intrinsic network in which the intra-iFC is significantly different across the three groups ( $P < 0.05$ , by one-way analysis of variance). The markers \*, †, and # indicate significant differences of intra-iFC between MHE and HCs, NHE and HCs, and NHE and MHE, respectively. MHE, minimal hepatic encephalopathy; NHE, patients without MHE; HCs, healthy controls. a/ip/spDMN, anterior/inferior-posterior/superior-posterior DMN; lv/rv/dCEN, left ventral/right ventral/dorsal CEN; SN, salience network. It is noted that MHE patients showed decreased trends in intra-iFC for all DMN, SN, and CEN networks.

Supplementary Figure 1

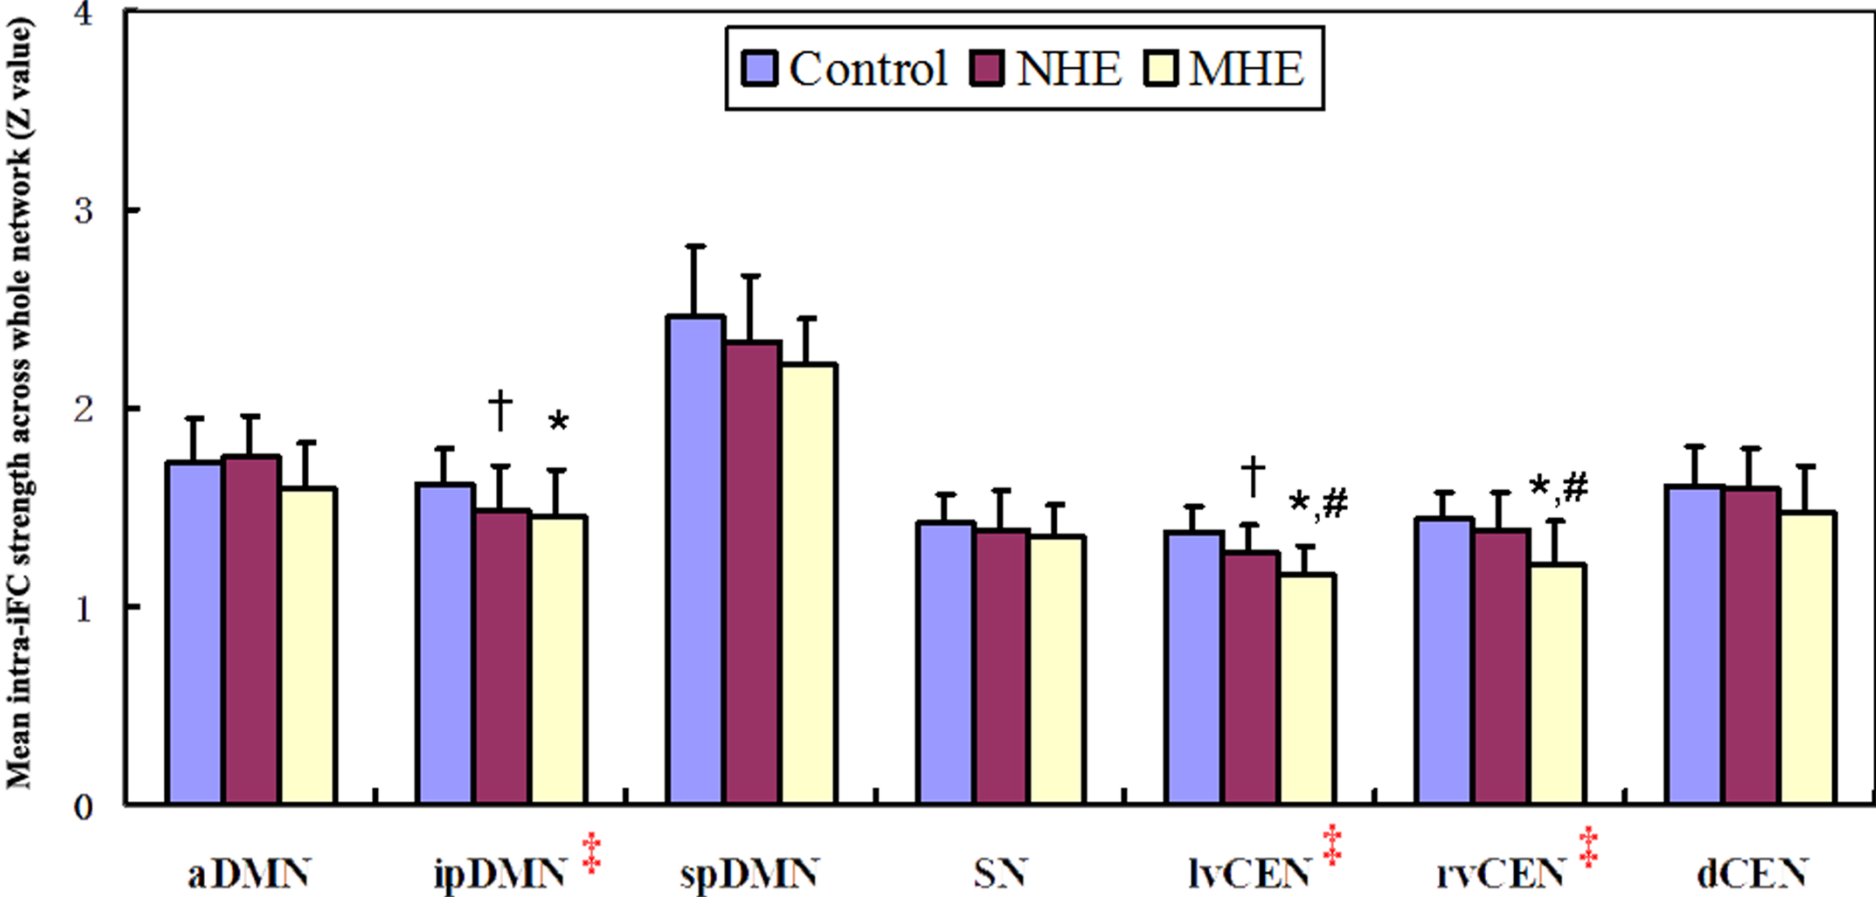

Supplement: srep27092-s1.pdf [file srep27092-s1.pdf]
